# Supplementary material for: Peptide functionalized upconversion/NIR II luminescent nanoparticles for targeted imaging and therapy of oral squamous cell carcinoma
Source: Royal Society of Chemistry journal article supplement (doi:10.1039/d0bm01737j), 2020-11-25
Supplement: d0bm01737j1.pdf [file d0bm01737j1.pdf]

## Supporting Information

### *Peptide functionalized upconversion/NIR II luminescence nanoparticles for targeted imaging and therapy of oral squamous cell carcinoma*

*Bi Lin,<sup>a,§</sup> Jun Wu,<sup>b,§</sup> Yanxing Wang,<sup>a,§</sup> Song Sun,<sup>a</sup> Ying Yuan,<sup>b</sup> Xiaofeng Tao,<sup>b,\*</sup> and Ruichan Lv,<sup>a,\*</sup>*

<sup>a</sup> Engineering Research Center of Molecular and Neuro Imaging, Ministry of Education, School of Life Science and Technology, Xidian University, Xi'an, Shanxi 710071, China. Email [rclv@xidian.edu.cn](mailto:rclv@xidian.edu.cn).

<sup>b</sup> Department of Radiology, School of Medicine, Shanghai Ninth People's Hospital, Shanghai Jiao Tong University, Shanghai 200011, China. Email: [yuan83@163.com](mailto:yuan83@163.com); [cjr.taoxiaofeng@vip.163.com](mailto:cjr.taoxiaofeng@vip.163.com)

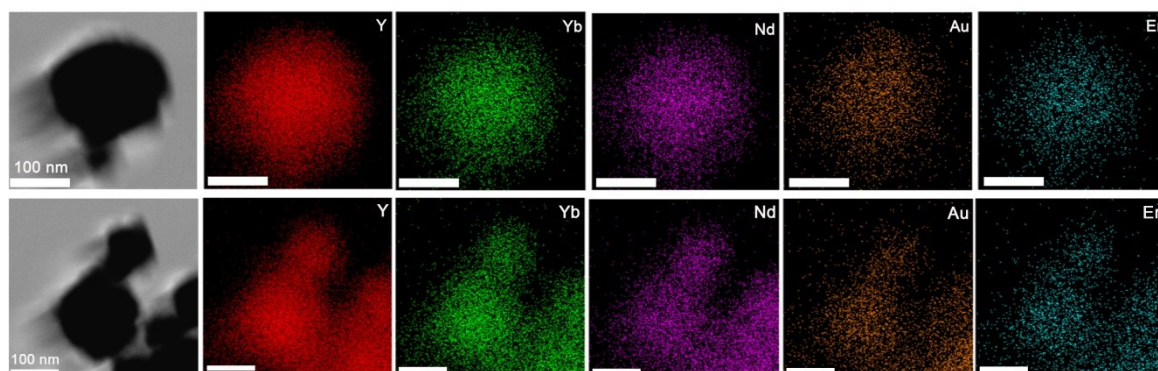

**Fig. S1** The element mapping of UCA (up) and UCA-cMBP (down).

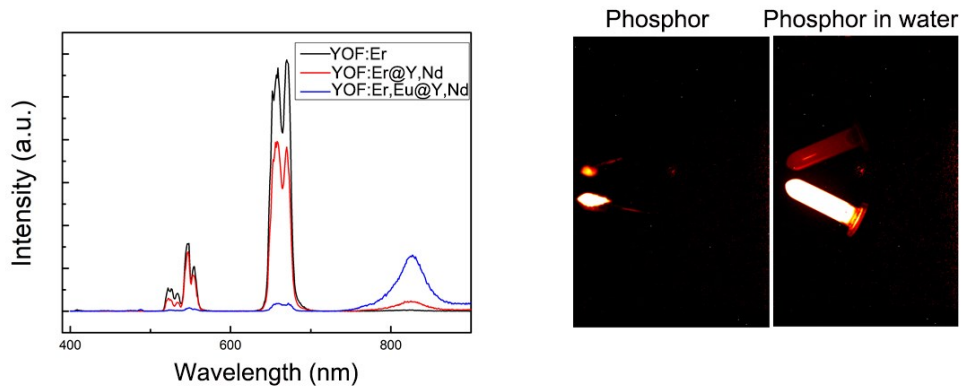

**Fig. S2.** UCL spectra and the NIR II imaging (YOF:Yb,Er and YOF:Yb,Er@Y,Nd) photographs of UCA phosphor and with water quenched.

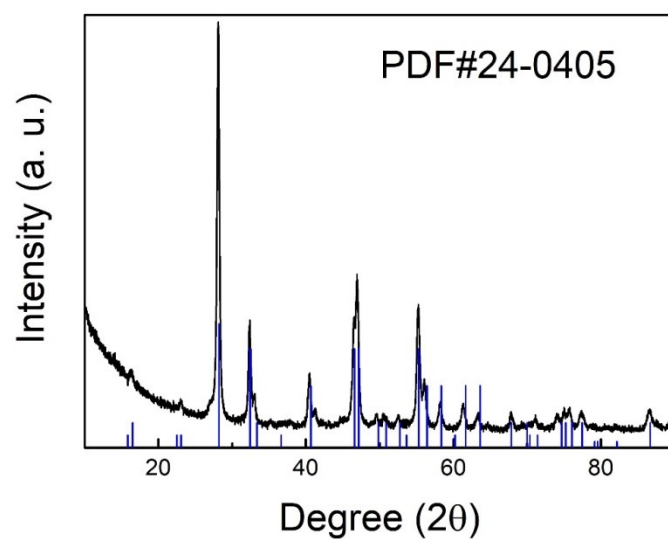

**Fig. S3.** XRD pattern and the corresponding JCPDS card of YOF:Yb,Er.

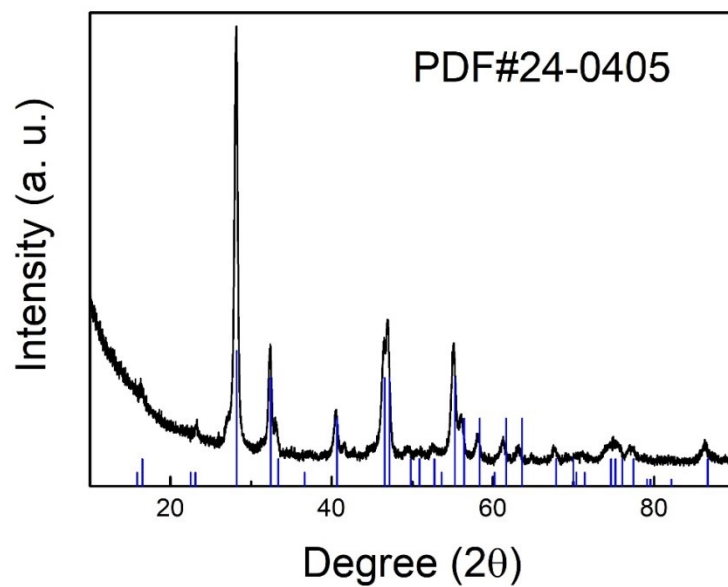

**Fig. S4.** XRD pattern and the corresponding JCPDS card of YOF:Yb,Er@YOF:Nd.

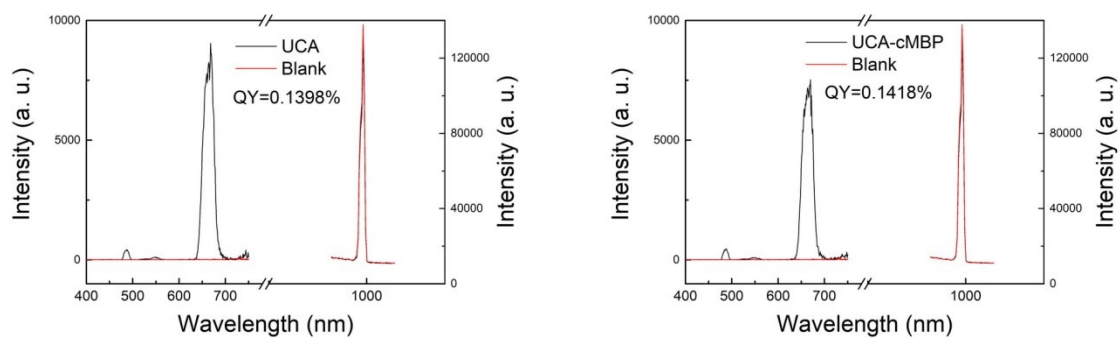

**Fig. S5** The absolute quantum yield calculations of UCA (left) and UCA-cMBP (right). The absorption spectra (by diffuse reflectance detection with integrating spheres) at the excitation wavelength of 980 nm and emission spectra in the visible region.

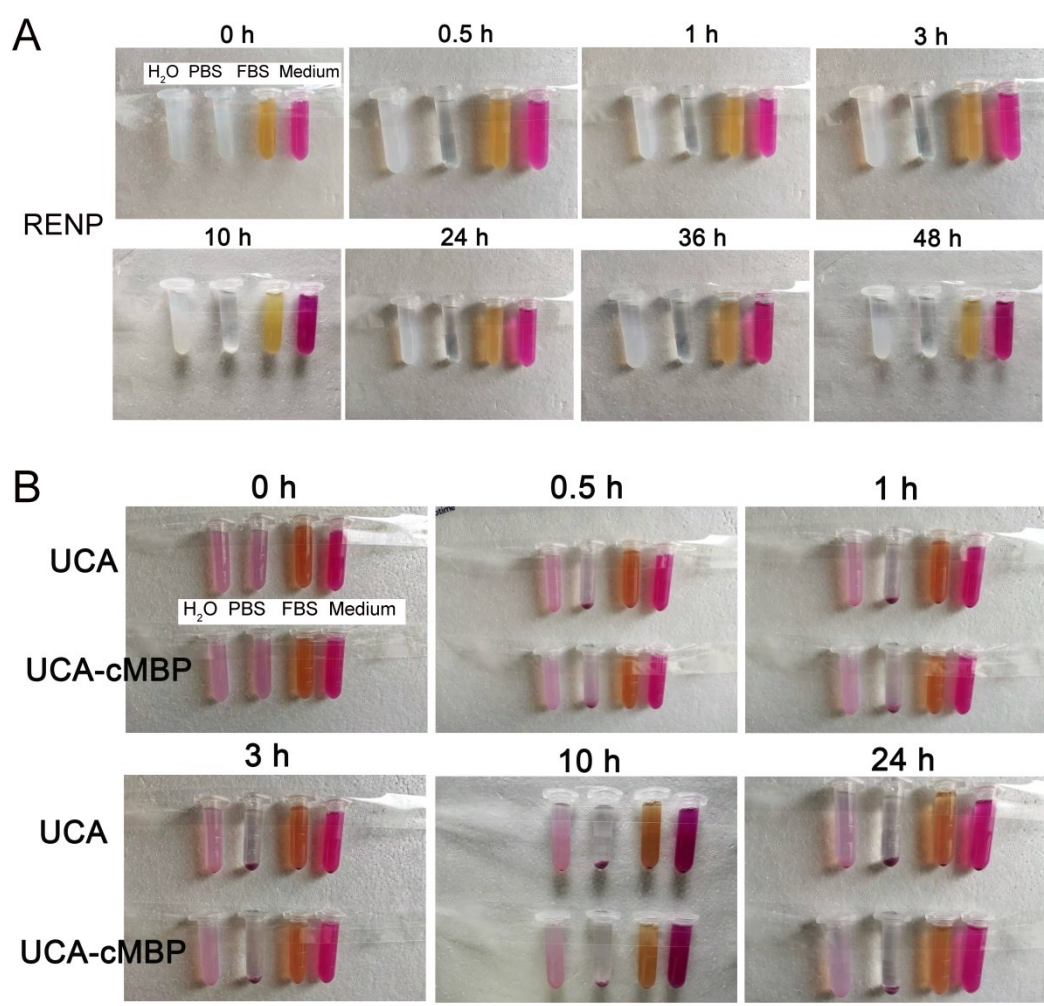

**Fig. S6** The samples of (A) RENP and (B) UCA, UCA-cMBP in different physiological solutions.

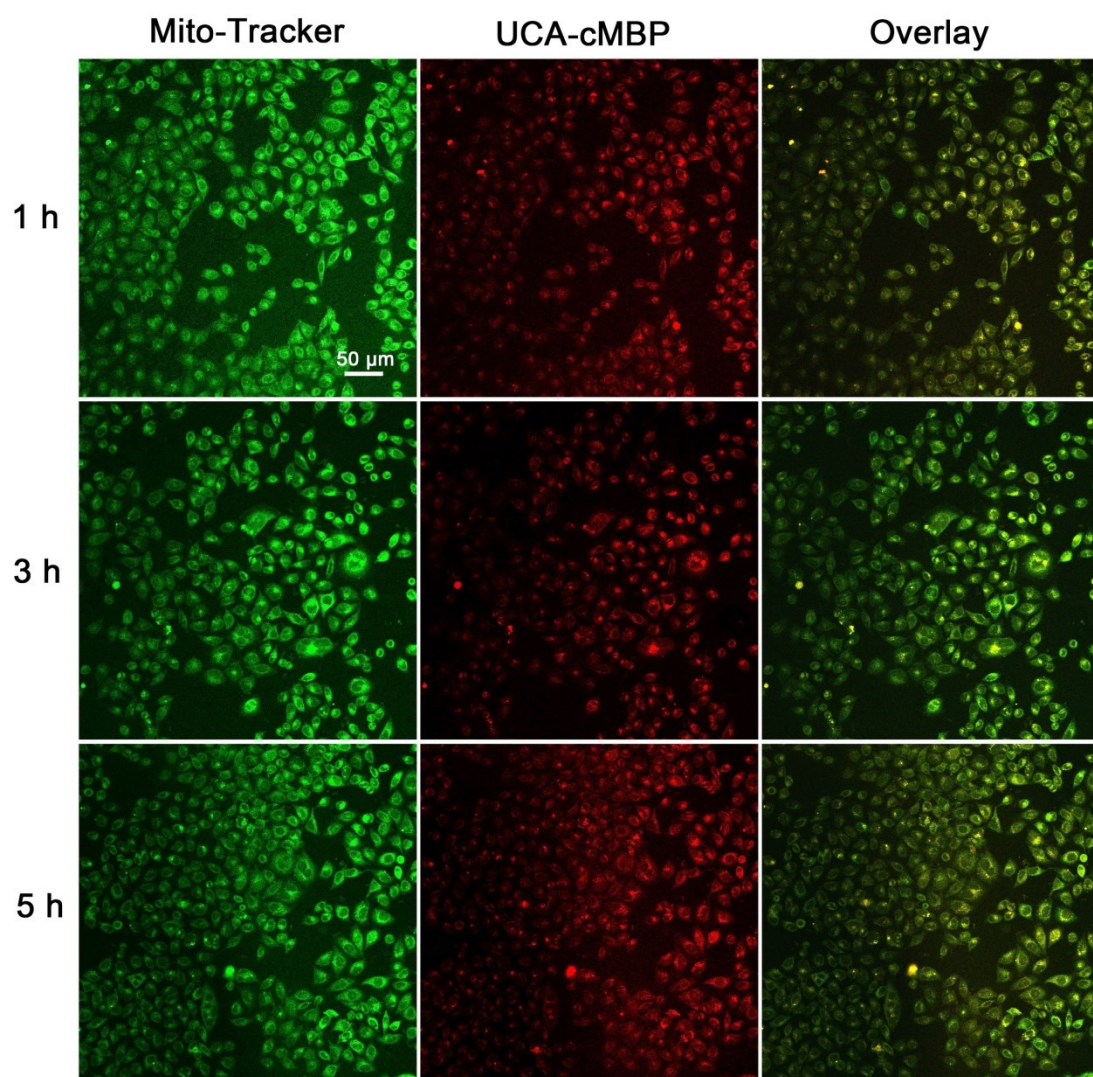

**Fig. S7** The confocal images of Cal27 cells co-incubated with UCNP-cMBP at different time points.



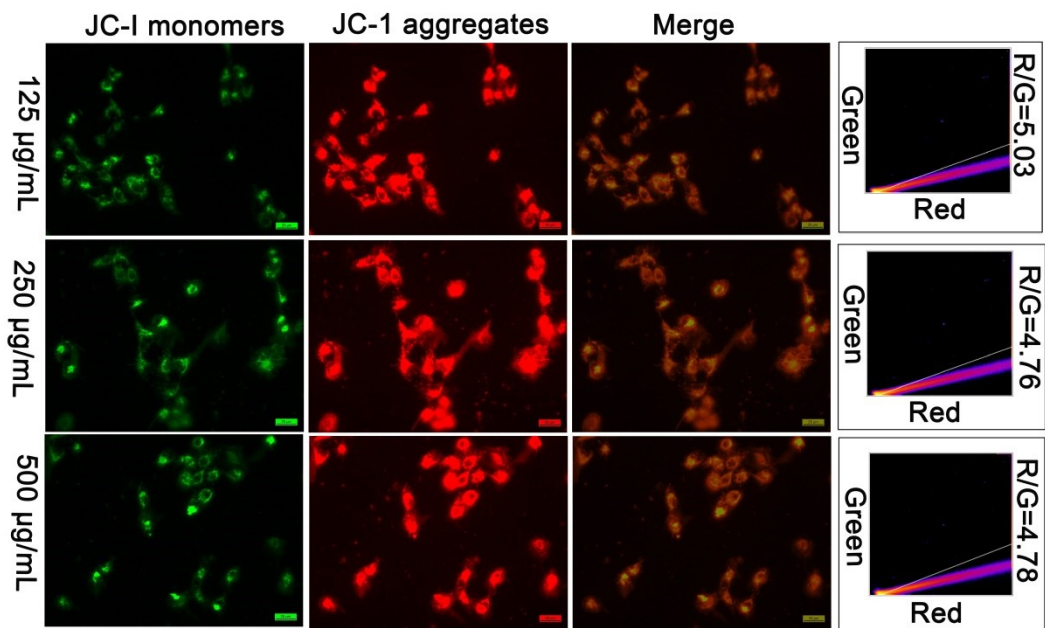

**Fig. S8** Cal27 cells co-incubated with different concentrations of UCA and marked with JC-1.

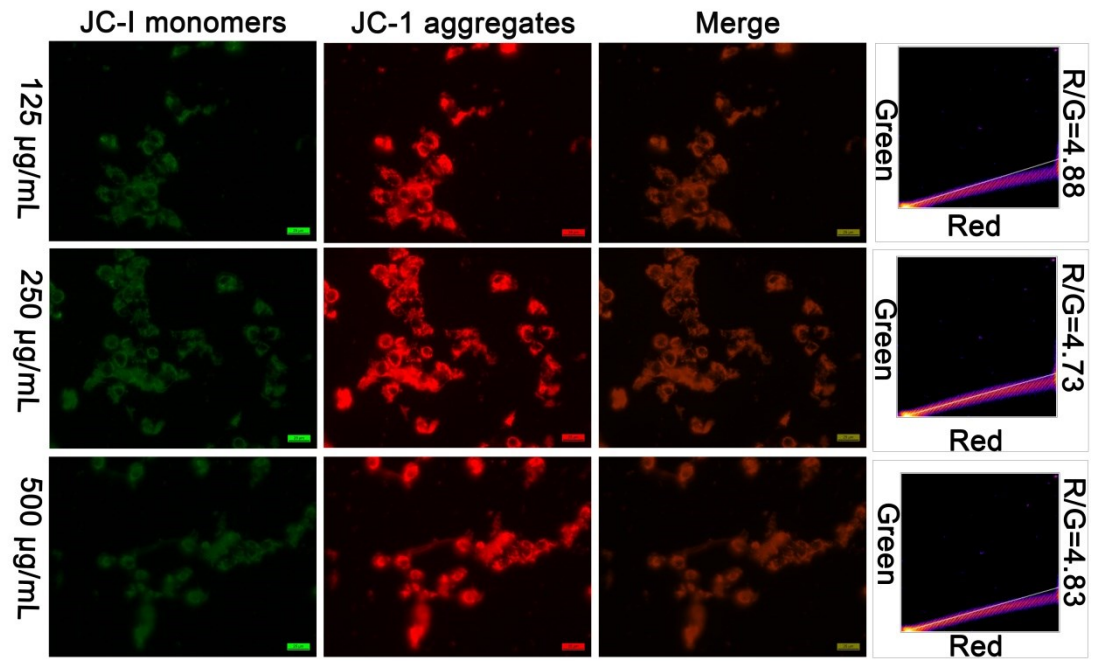

**Fig. S9** Cal27 cells co-incubated with different concentrations of cMBP and marked with JC-1.

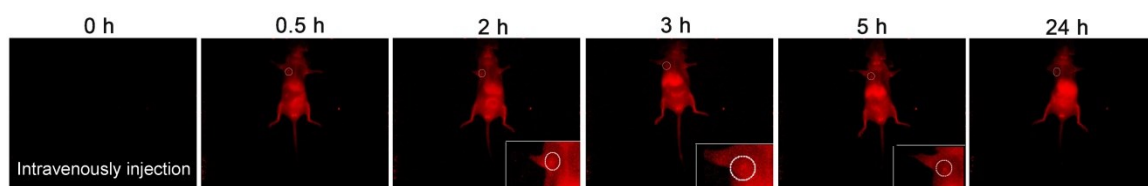

**Fig. S10** The NIR II imaging photograph to micro TSCC tumor after intravenously injected with UCA-cMEI with different time points.

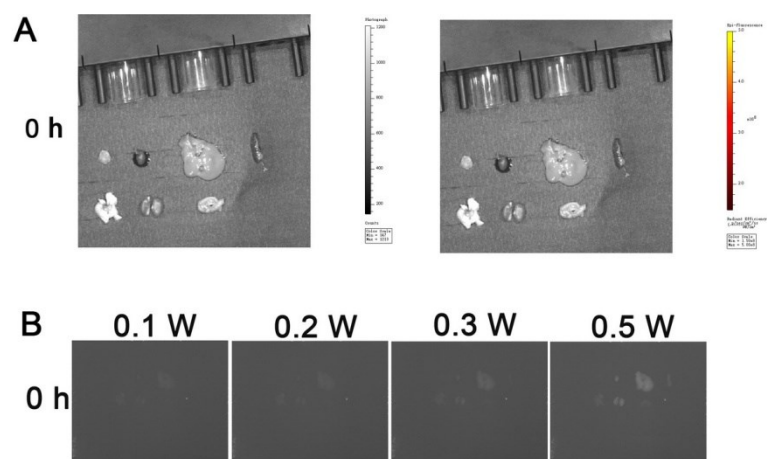

**Fig. S11** The blank group as the control. (A) Fluorescence imaging photographs and (B) NIR II imaging photographs of mice organs without injection.

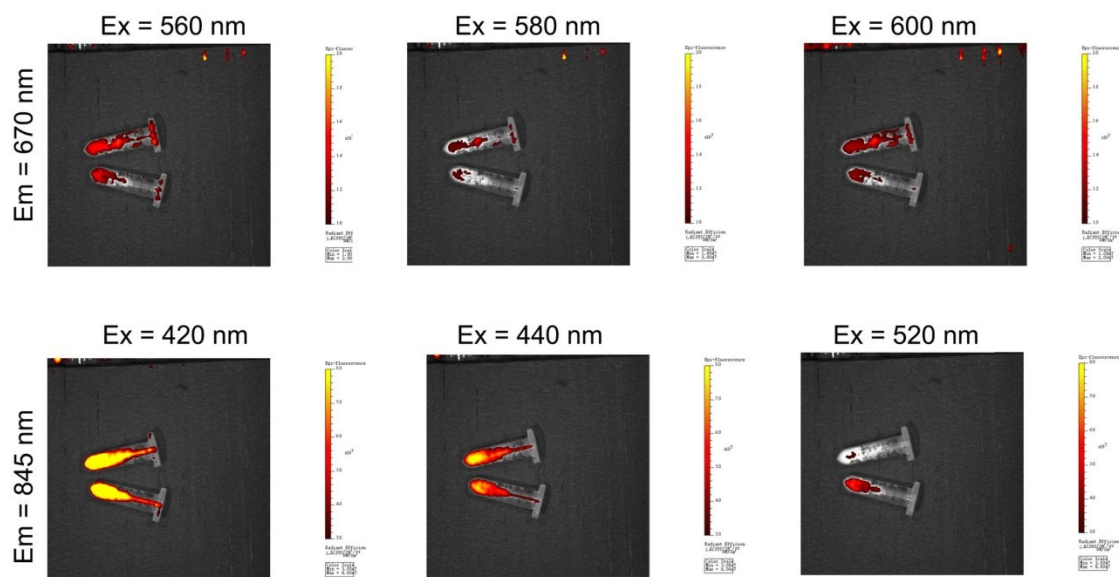

**Fig. S12** The fluorescence imaging photographs of UCA-cMBP samples (two same samples in the separate tubes) under different excitation and emission wavelengths.
